# Supplementary material for: Assessing the role of plasma-engineered acceptor-like intra- and inter-grain boundaries of heterogeneous WS2–WO3 nanosheets for photocurrent characteristics
Source: Royal Society of Chemistry journal article supplement (doi:10.1039/d0na00158a), 2020-01-01
Supplement: d0na00158a1.pdf [file d0na00158a1.pdf]

## Supplementary Material

# Assessing the role of plasma engineered *acceptor-like* intra- and inter-grain boundaries in heterogeneous $WS_2$ - $WO_3$ films on photo-current characteristics

Gopika Gopakumar, Shantikumar V. Nair and Mariyappan Shanmugam\*  
Amrita Centre for Nanosciences and Molecular Medicine  
Amrita Vishwa Vidyapeetham, Kerala-682041, India  
\*Corresponding author e-mail: [mshamugham@aims.amrita.edu](mailto:mshamugham@aims.amrita.edu)

Nanopowder of various functional semiconductors and oxides have recently been demonstrated in various possible applications including lubricants,<sup>1-3</sup> photocatalysis,<sup>4-6</sup> and photovoltaics.<sup>7,8</sup>

The following table lists recently reported nanopowder compositions and their applications.

| Nanopowders                | Applications                                                                 | Comments                                                                                                                                                                        | Reference |
|----------------------------|------------------------------------------------------------------------------|---------------------------------------------------------------------------------------------------------------------------------------------------------------------------------|-----------|
| MoS <sub>2</sub>           | Electrode in solar cells.                                                    | Comparable photovoltaic performance of solar cells has been reported using MoS <sub>2</sub> as an electrode to replace expensive platinum and other metals used in solar cells. | 9, 10     |
| MoSe <sub>2</sub>          | Electrode in solar cells.<br>In energy storage devices and opto-electronics. | Decreased charge transfer resistance in dye sensitized solar cell and improved photovoltaic performance.                                                                        | 11, 12    |
| WSe <sub>2</sub> composite | Electrode in solar cells.                                                    | Dye sensitized solar cells with conversion efficiency of 12.23% was reported.                                                                                                   | 13        |
| WSe <sub>2</sub>           | sodium-ion batteries.                                                        | Showed high discharge capacity along with improved cycling stability due to the buffering effect                                                                                | 14        |

|                                  |                                           |                                                                                                                                                |              |
|----------------------------------|-------------------------------------------|------------------------------------------------------------------------------------------------------------------------------------------------|--------------|
|                                  |                                           | of the carbon coated on WSe <sub>2</sub> .                                                                                                     |              |
| WO <sub>3</sub>                  | Pseudocapacitor.                          | Specific capacitance of 35.70 F/g was reported for Zn-WO <sub>3</sub> nanopowder.                                                              | 15           |
| WS <sub>2</sub> -WO <sub>3</sub> | Light-mater interaction, optoelectronics. | Effect of grain and grain-boundary distribution on photo-current characteristics of composite WS <sub>2</sub> -WO <sub>3</sub> films reported. | Present work |

## References

1. V. An, Y. Irtegov, and C. De Izarra. *J. Nanomater* 2014 (2014).
2. L. Rapoport, V. Leshchinsky, I. Lapsker, Yu Volovik, O. Nepomnyashchy, M. Lvovsky, R. Popovitz-Biro, Y. Feldman, and R. Tenne. *Wear* 2003, **255**, 785-793.
3. L. Rapoport, N. Fleischer, and R. Tenne. *Adv. Mater.* 2003, **15**, 651-655.
4. D. James, and T. Zubkov. *J. Photochem. & Photobiol A: Chemistry* 2013, **262**, 45-51.
5. Y. Zhong, G. Zhao, F. Ma, Y. Wu, and X. Hao. *Appl. Catalysis B: Environmental* 2016, **199**, 466-472.
6. S. V. Vattikuti, and C Byon. *Science of Advanced Materials* 2015, 7, 2639-2645.
7. S. Li, Z. Chen, and W. Zhang. *Mater. Lett* 2012, **72**, 22-24.
8. J. Huang, X. Qian, J. Yang, Y. Niu, C. Xu, and L. Hou. *Electrochimica Acta* 2020, 135949.
9. N. Huang, G. Li, Z. Xia, F. Zheng, H. Huang, W. Li, C. Xiang, Y. Sun, P. Sun, and X. Sun. *Electrochimica Acta* 2017, **235**, 182-190.
10. W.-H. Jhang, and Y.-J. Lin. *Current Appl. Phys.* 2015, **15**, 906-909.

11. X. Yuan, B. Zhou, X. Zhang, Y. Li, and L. Liu. *Electrochimica Acta* 2018, **283**,1163-1169.
12. A. Eftekhari, *Appl. Mater.Today* 2017, **8**, 1-17.
13. Y. Areerob, K.Y. Cho, C.-H. Jung, and W.-C. Oh. *J. Alloys & Compounds* 2019, **775**, 690-697.
14. Z. Zhang, X. Yang, and Y. Fu. *RSC Adv* 2016, **6**, 12726-12729.
15. R. D. Kumar, Y. Andou, and S. Karuppuchamy, *J. Phys. & Chem. Solids* 2016, **92**, 94-99.
